# Supplementary material for: Foraminiferal holobiont thermal tolerance under climate change – Roommates problems or successful collaboration?
Source: Copernicus journal article supplement (doi:10.5194/bg-2019-511), 2020-01-20
Supplement: Supplementary file 1 [file bg-2019-511-supplement.pdf]

## Supplement 1:

Technical details and statistical analyses described in this study.

**Supplementary Table S1:** Technical details of all experiments included in this study.

|                                    | February experiment     | May experiment                                                                                |
|------------------------------------|-------------------------|-----------------------------------------------------------------------------------------------|
| Number of individuals in sample    | 50                      | <i>S. orbiculus</i> - 40<br><i>A. lobifera</i> - 30                                           |
| Size fraction of individuals       | 600-1000 $\mu\text{m}$  | 750-1000 $\mu\text{m}$                                                                        |
| Number of replicates               | 5                       | 4                                                                                             |
| Excluded samples after acclimation | One from 35°C treatment | <i>S. orbiculus</i> - One from 30°C treatment<br><i>A. lobifera</i> - One from 25°C treatment |
| Seawater properties                | Natural, unfiltered     | Natural, filtered 45 $\mu\text{m}$                                                            |
| Acclimation conditions             | 25°C                    | <i>S. orbiculus</i> -27°C<br><i>A. lobifera</i> - 25°C                                        |

**Supplementary Table S2.1:** One-way ANOVA comparing calcification rates of the three examined groups after the acclimation phase.

|           | SS     | n  | MS     | F        | p    |
|-----------|--------|----|--------|----------|------|
| Intercept | 159.65 | 1  | 159.65 | 12020.26 | 0.00 |
| Group     | 7.2    | 2  | 3.6    | 271.04   | 0.00 |
| Error     | 0.62   | 47 | 0.01   |          |      |

**Supplementary Table S2.2:** Tukey HSD post-hoc test demonstrating the differences between calcification rate of the three groups after the acclimation phase. Stars indicate homogenous groups and thus significant differences between them.

| Group                     | log (Calcification rates) | 1    | 2    | 3    |
|---------------------------|---------------------------|------|------|------|
| <i>S. orbiculus</i> - Feb | 1.29                      | **** |      |      |
| <i>S. orbiculus</i> - May | 1.99                      |      | **** |      |
| <i>A. lobifera</i> - May  | 2.16                      |      |      | **** |

**Supplementary Table S3.1:** One-way ANOVA comparing photosynthesis activity of the three examined groups after the acclimation phase.

|           | SS       | n  | MS      | F     | p        |
|-----------|----------|----|---------|-------|----------|
| Intercept | 16993.20 | 1  | 16993.2 | 199.0 | 0.000000 |
| Group     | 2502.53  | 1  | 2502.5  | 29.3  | 0.000009 |
| Error     | 2390.85  | 28 | 85.4    |       |          |

**Supplementary Table S3.2:** Tukey HSD post-hoc test demonstrating the differences between photosynthesis activity of the three groups after the acclimation phase. Stars indicate homogenous groups and thus significant differences between them.

| Group                     | Photosynthesis activity | 1    | 2    |
|---------------------------|-------------------------|------|------|
| <i>S. orbiculus</i> - May | 14.67                   | **** |      |
| <i>A. lobifera</i> - May  | 32.93                   |      | **** |

**Supplementary Table S4:** Multiple Comparisons p-values for Kruskal-Wallis non parametric test comparing calcification rates of *S. orbiculus* winter population under different temperature treatments and weeks.

|                                                                            |          |          |          |          |
|----------------------------------------------------------------------------|----------|----------|----------|----------|
| Kruskal-Wallis comparing temperatures: $H(3, N=76) = 40.20611$ $p = .0000$ |          |          |          |          |
| Kruskal-Wallis comparing weeks: $H(3, N=76) = 3.502386$ $p = .3205$        |          |          |          |          |
|                                                                            | 25       | 30       | 32       | 35       |
| 25                                                                         |          | 0.025102 | 1.000000 | 0.002917 |
| 30                                                                         | 0.025102 |          | 0.469084 | 0.000000 |
| 32                                                                         | 1.000000 | 0.469084 |          | 0.000036 |
| 35                                                                         | 0.002917 | 0.000000 | 0.000036 |          |

**Supplementary Table S5.1:** Two-way ANOVA comparing calcification rates of *S. orbiculus* spring population under different temperature treatments and weeks.

|                  | SS       | n  | MS       | F        | p        |
|------------------|----------|----|----------|----------|----------|
| Intercept        | 435511.7 | 1  | 435511.7 | 955.0896 | 0.000000 |
| Temperature      | 8459.2   | 3  | 2819.7   | 6.1838   | 0.001875 |
| Week             | 4651.9   | 2  | 2326.0   | 5.1009   | 0.011741 |
| Temperature*Week | 10814.5  | 6  | 1802.4   | 3.9527   | 0.004362 |
| Error            | 15047.7  | 33 | 456.0    |          |          |

**Supplementary Table S5.2:** Tukey HSD post-hoc test demonstrating the differences between calcification rates of *S. orbiculus* spring population under different temperature treatments and between weeks. Stars indicate homogenous groups and thus significant differences between them.

| Temperature | Week | Calcification rates | 1    | 2    | 3    |
|-------------|------|---------------------|------|------|------|
| 25          | 1    | 102.41              | **** | **** | **** |
| 30          | 1    | 86.20               | **** | **** |      |
| 32          | 1    | 102.96              | **** | **** | **** |
| 35          | 1    | 109.87              | **** | **** | **** |
| 25          | 2    | 92.51               | **** | **** | **** |
| 30          | 2    | 90.10               | **** | **** | **** |
| 32          | 2    | 98.62               | **** | **** | **** |
| 35          | 2    | 62.89               | **** |      |      |
| 25          | 3    | 106.24              | **** | **** | **** |
| 30          | 3    | 131.43              |      | **** | **** |
| 32          | 3    | 144.30              |      |      | **** |
| 35          | 3    | 62.18               | **** |      |      |

**Supplementary Table S6:** Welch's ANOVA and Tukey HSD post-hoc test comparing photosynthetic activity of *S. orbiculus* spring population under different temperature treatments and between weeks.

|                                                                     |          |          |          |          |
|---------------------------------------------------------------------|----------|----------|----------|----------|
| Welch's ANOVA comparing temperatures: $F: 28.69839$ , $P: 0.000000$ |          |          |          |          |
| Welch's ANOVA comparing weeks: $F: 0.345750$ , $P: 0.710967$        |          |          |          |          |
|                                                                     | 25       | 30       | 32       | 35       |
| 25                                                                  |          | 0.093500 | 0.975656 | 0.000163 |
| 30                                                                  | 0.093500 |          | 0.199400 | 0.000284 |
| 32                                                                  | 0.975656 | 0.199400 |          | 0.000163 |
| 35                                                                  | 0.000163 | 0.000284 | 0.000163 |          |

**Supplementary Table S7.1:** Two-way ANOVA comparing calcification rates of *A. lobifera* spring population under different temperature treatments and between weeks.

|                  | SS       | n  | MS    | F      | p        |
|------------------|----------|----|-------|--------|----------|
| Intercept        | 53.86997 | 1  | 53.90 | 666.57 | 0.000000 |
| Temperature      | 3.06627  | 3  | 1.02  | 12.65  | 0.000051 |
| Week             | 0.07153  | 1  | 0.072 | 0.89   | 0.357025 |
| Temperature*Week | 0.23488  | 3  | 0.078 | 0.97   | 0.425157 |
| Error            | 1.77797  | 22 | 0.08  |        |          |

**Supplementary Table S7.2:** Tukey HSD post-hoc test demonstrating the differences between calcification rates of *A. lobifera* spring population under different temperature treatments and between weeks. Stars indicate homogenous groups and thus significant differences between them.

| Temperature | Week | Log      | 1    | 2    |
|-------------|------|----------|------|------|
| 25          | 1    | 1.637020 | **** |      |
| 30          | 1    | 1.585204 | **** |      |
| 32          | 1    | 1.573123 | **** |      |
| 35          | 1    | 0.803304 |      | **** |
| 25          | 2    | 1.267510 | **** | **** |
| 30          | 2    | 1.683252 | **** |      |
| 32          | 2    | 1.406749 | **** | **** |
| 35          | 2    | 0.847461 |      | **** |

**Supplementary Table S8.1:** Two-way ANOVA comparing photosynthetic activity of *A. lobifera* spring population under different temperature treatments and between weeks.

|                  | SS       | n  | MS      | F     | p        |
|------------------|----------|----|---------|-------|----------|
| Intercept        | 4870.09  | 1  | 4870.09 | 21.92 | 0.000114 |
| Temperature      | 12698.82 | 3  | 4232.94 | 19.05 | 0.000003 |
| Week             | 420.01   | 1  | 420.01  | 1.89  | 0.183001 |
| Temperature*Week | 574.36   | 3  | 191.45  | 0.86  | 0.475630 |
| Error            | 4888.04  | 22 | 222.18  |       |          |

**Supplementary Table S8.2:** Tukey HSD post-hoc test demonstrating the differences between photosynthetic activity of *A. lobifera* spring population under different temperature treatments and between weeks. Stars indicate homogenous groups and thus significant differences between them.

|   | Temperature | Week | Photosynthetic activity | 1    | 2    | 3    |
|---|-------------|------|-------------------------|------|------|------|
| 1 | 25          | 1    | 33.78                   | **** |      |      |
| 3 | 30          | 1    | 22.92                   | **** |      |      |
| 5 | 32          | 1    | 24.92                   | **** |      |      |
| 7 | 35          | 1    | -15.17                  |      | **** | **** |
| 2 | 25          | 2    | 21.78                   | **** | **** |      |
| 4 | 30          | 2    | 9.75                    | **** | **** |      |
| 6 | 32          | 2    | 32.17                   | **** |      |      |
| 8 | 35          | 2    | -27.42                  |      |      | **** |

**Supplement 2:**

Raw data: calcification rates and photosynthetic activity measured in the experiments.

**Table S1:** Calcification rates ( $\mu\text{mol CaCO}_3 \text{ week}^{-1} \text{ individual}^{-1}$ ) and photosynthetic activity ( $\mu\text{g/L O}_2 \text{ individual}^{-1}$ ) baseline measurements after the acclimation period of *Sorites orbiculus* and *Amphistegina lobifera*.

|    | <i>S. orbiculus</i> February | <i>S. orbiculus</i> May |                         | <i>A. lobifera</i> May |                         |
|----|------------------------------|-------------------------|-------------------------|------------------------|-------------------------|
|    | Calcification rate           | Calcification rate      | Photosynthetic activity | Calcification rate     | Photosynthetic activity |
| 1  | 20 ± 8                       | 91 ± 7                  | 13                      | 212 ± 5                | 43                      |
| 2  | 22 ± 10                      | 66 ± 10                 | 12                      | -                      | -                       |
| 3  | 22 ± 7                       | 97 ± 3                  | 15                      | 110 ± 8                | 19                      |
| 4  | 25 ± 9                       | 95 ± 0                  | 14                      | 131 ± 14               | 35                      |
| 5  | 24 ± 7                       | 106 ± 7                 | 21                      | 0 ± 0                  | 40                      |
| 6  | 13 ± 4                       | 107 ± 5                 | 27                      | 119 ± 15               | 25                      |
| 7  | -                            | 101 ± 0                 | 22                      | 128 ± 3                | 43                      |
| 8  | 15 ± 5                       | 106 ± 3                 | 28                      | 134 ± 0                | 35                      |
| 9  | 17 ± 5                       | 85 ± 12                 | 9                       | 184 ± 11               | 53                      |
| 10 | 19 ± 9                       | -                       | -                       | 219 ± 0                | 21                      |
| 11 | 31 ± 8                       | 74 ± 3                  | 12                      | 84 ± 5                 | 25                      |
| 12 | 34 ± 12                      | 83 ± 6                  | 15                      | 119 ± 3                | 10                      |
| 13 | 19 ± 8                       | 67 ± 3                  | 11                      | 117 ± 14               | 42                      |
| 14 | 33 ± 14                      | 138 ± 1                 | 5                       | 229 ± 9                | 35                      |
| 15 | 16 ± 5                       | 71 ± 6                  | 9                       | 151 ± 15               | 30                      |
| 16 | 24 ± 2                       | 76 ± 10                 | 9                       | 134 ± 22               | 38                      |
| 17 | 27 ± 9                       |                         |                         |                        |                         |
| 18 | 25 ± 10                      |                         |                         |                        |                         |
| 19 | 17 ± 8                       |                         |                         |                        |                         |
| 20 | 22 ± 7                       |                         |                         |                        |                         |

**Table S2:** Calcification rates ( $\mu\text{mol CaCO}_3 \text{ week}^{-1} \text{ individual}^{-1}$ ) of *S. orbiculus* winter population under different temperature treatments and weeks.

| Temperature (C°) | Week 1  | Week 2  | Week 3  | Week 4   |
|------------------|---------|---------|---------|----------|
| 25               | 32 ± 8  | 84 ± 19 | 94 ± 10 | 90 ± 8   |
|                  | 13 ± 5  | 44 ± 3  | 42 ± 30 | 59 ± 11  |
|                  | 29 ± 0  | 48 ± 7  | 34 ± 5  | 47 ± 4   |
|                  | 48 ± 1  | 69 ± 1  | 37 ± 5  | 26 ± 13  |
|                  | 58 ± 8  | 39 ± 2  | 39 ± 2  | 10 ± 4   |
| 30               | 8 ± 6   | 19 ± 0  | 9 ± 5   | 8 ± 10   |
|                  | -       | -       | -       | -        |
|                  | 33 ± 1  | 16 ± 4  | 4 ± 1   | 0 ± 6    |
|                  | 35 ± 4  | 30 ± 2  | 11 ± 0  | -2 ± 1   |
|                  | 25 ± 5  | 28 ± 4  | 8 ± 7   | 12 ± 3   |
| 32               | 40 ± 17 | 61 ± 10 | 71 ± 10 | 74 ± 3   |
|                  | 52 ± 2  | 77 ± 11 | 90 ± 5  | 104 ± 11 |
|                  | 26 ± 7  | 68 ± 1  | 99 ± 2  | 96 ± 1   |
|                  | 36 ± 0  | 64 ± 3  | 70 ± 6  | 72 ± 9   |
|                  | 96 ± 5  | 80 ± 1  | 63 ± 8  | 58 ± 3   |
| 35               | 56 ± 2  | 52 ± 2  | 39 ± 3  | 62 ± 12  |
|                  | 43 ± 0  | 39 ± 16 | 53 ± 1  | 94 ± 10  |
|                  | 46 ± 7  | 62 ± 16 | 81 ± 10 | 103 ± 12 |
|                  | 54 ± 5  | 51 ± 2  | 33 ± 11 | 43 ± 1   |
|                  | 41 ± 12 | 59 ± 10 | 59 ± 2  | 59 ± 0   |

**Table S3:** Calcification rates ( $\mu\text{mol CaCO}_3 \text{ week}^{-1} \text{ individual}^{-1}$ ) and photosynthetic activity ( $\mu\text{g/L O}_2 \text{ individual}^{-1}$ ) of *S. orbiculus* spring population under different temperature treatments and weeks.

| Temperature (C°) | Week 1             |                         | Week 2             |                         | Week 3             |                         |
|------------------|--------------------|-------------------------|--------------------|-------------------------|--------------------|-------------------------|
|                  | Calcification rate | Photosynthetic activity | Calcification rate | Photosynthetic activity | Calcification rate | Photosynthetic activity |
| 25               | 81 ± 15            | 18                      | 65 ± 6             | 27                      | 74 ± 6             | 40                      |
|                  | 97 ± 12            | 22                      | 103 ± 6            | 25                      | 119 ± 10           | 26                      |
|                  | 107 ± 7            | 33                      | 92 ± 2             | 20                      | 101 ± 1            | 20                      |
|                  | 125 ± 2            | 33                      | 110 ± 2            | 25                      | 131 ± 14           | 13                      |
| 30               | 101 ± 12           | 10                      | 56 ± 2             | 38                      | 40 ± 2             | 19                      |
|                  | -                  | -                       | -                  | -                       | -                  | -                       |
|                  | 116 ± 7            | 13                      | 69 ± 1             | 3                       | 66 ± 8             | 4                       |
|                  | 102 ± 3            | 15                      | 72 ± 7             | 6                       | 101 ± 4            | 12                      |
| 32               | 83 ± 7             | 14                      | 109 ± 3            | 13                      | 156 ± 0            | 44                      |
|                  | 0 ± 0              | 23                      | 0 ± 0              | 9                       | 0 ± 0              | 55                      |
|                  | 99 ± 9             | 16                      | 82 ± 9             | 14                      | 113 ± 2            | 26                      |
|                  | 77 ± 9             | 18                      | 79 ± 9             | -30                     | 126 ± 8            | 34                      |
| 35               | 106 ± 7            | -2                      | 88 ± 10            | -17                     | 93 ± 11            | -25                     |
|                  | 97 ± 10            | -4                      | 83 ± 3             | -18                     | 183 ± 0            | -28                     |
|                  | 117 ± 16           | 2                       | 130 ± 4            | -3                      | 138 ± 7            | -7                      |
|                  | 92 ± 3             | -10                     | 94 ± 4             | 1                       | 129 ± 7            | 50                      |

**Table S4:** Calcification rate ( $\mu\text{mol CaCO}_3 \text{ week}^{-1} \text{ individual}^{-1}$ ) and photosynthetic activity ( $\mu\text{g/L O}_2 \text{ individual}^{-1}$ ) of *A. lobifera* spring population under different temperature treatments and weeks.

| Temperature (C°) | Week 1             |                         | Week 2             |                         |
|------------------|--------------------|-------------------------|--------------------|-------------------------|
|                  | Calcification rate | Photosynthetic activity | Calcification rate | Photosynthetic activity |
| 25               | 41 ± 11            | 25                      | 18 ± 0             | 0                       |
|                  | -                  | -                       | -                  | -                       |
|                  | 98 ± 17            | 49                      | 68 ± 15            | 43                      |
|                  | 20 ± 6             | 27                      | 5 ± 8              | 23                      |
| 30               | 10 ± 14            | 28                      | 6 ± 18             | 4                       |
|                  | 2 ± 6              | 18                      | 10 ± 8             | -6                      |
|                  | 8 ± 4              | 46                      | 11 ± 12            | 41                      |
|                  | 9 ± 14             | 0                       | 4 ± 28             | 4                       |
| 32               | 36 ± 6             | 26                      | 28 ± 14            | 45                      |
|                  | 39 ± 0             | 26                      | 66 ± 17            | 22                      |
|                  | 67 ± 2             | 25                      | 70 ± 8             | 28                      |
|                  | 24 ± 18            | 23                      | 41 ± 0             | 35                      |
| 35               | 59 ± 8             | -11                     | 22 ± 0             | -33                     |
|                  | 18 ± 10            | -27                     | 15 ± 3             | -16                     |
|                  | 30 ± 7             | -14                     | 37 ± 9             | -46                     |
|                  | 60 ± 3             | -8                      | 36 ± 9             | -16                     |
